# Supplementary material
Source: PubMed Central journal article supplement (PMC3734568)
Supplement: supp_M112.026716_mcp.M112.026716-1.pdf [file supp_M112.026716_mcp.M112.026716-1.pdf]

### Supplemental Figure 1A. H3 EIAQDF<sup>79</sup>K(Me<sub>0</sub>)TDLR Peptide fragment

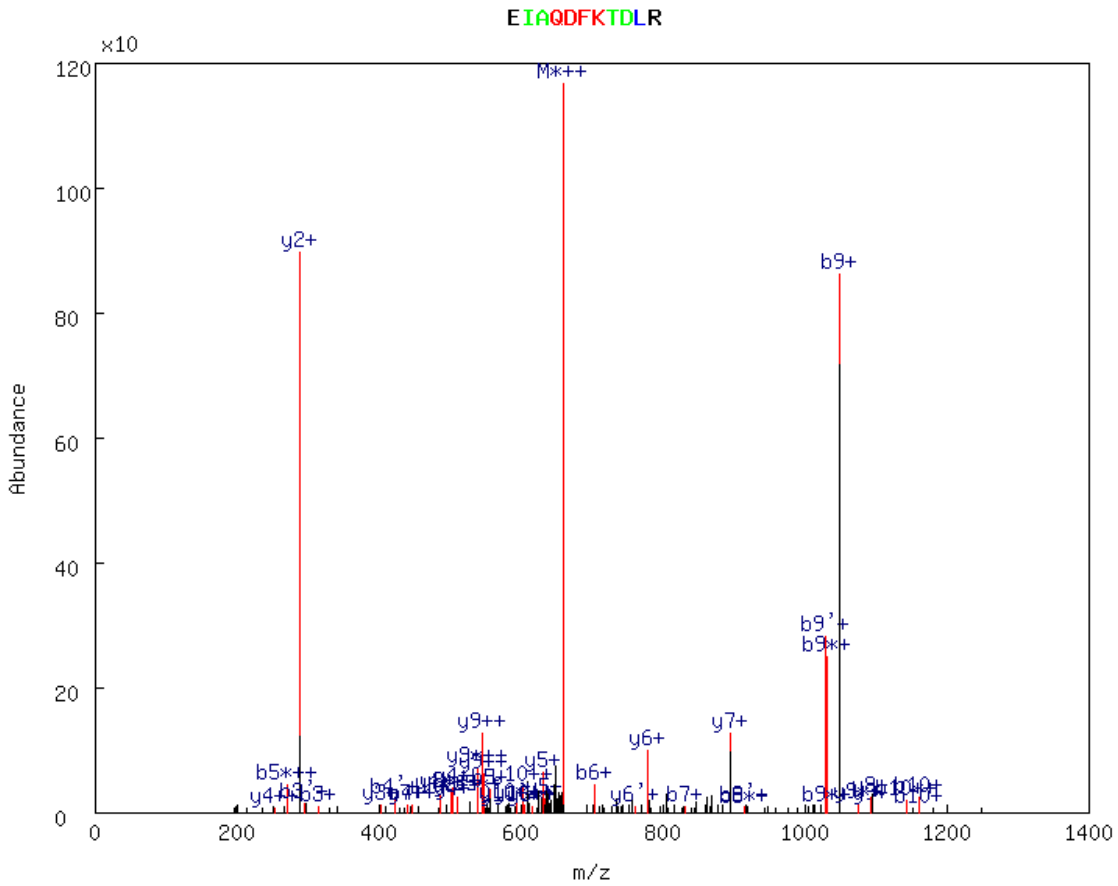

Index scan# charge score pp pp<sub>2</sub> pp<sub>tag</sub> m/z MW(obs) MW delta miss Unique sequence + modifications  
[1080](#) 2480 +2 47 **11.0** **8.4** **5.3** 668.3484 1335.6895 1335.6903 -0.0008 0 x **EIAQDFK<sup>79</sup>TDLR**

| #  | b <sup>++</sup> | b <sup>++</sup> | b <sup>++</sup> | b <sup>+</sup> | b <sup>+</sup> | b <sup>+</sup> | seq      | y <sup>++</sup> | y <sup>++</sup> | y <sup>++</sup> | y <sup>+</sup> | y <sup>+</sup> | y <sup>+</sup> | #         |
|----|-----------------|-----------------|-----------------|----------------|----------------|----------------|----------|-----------------|-----------------|-----------------|----------------|----------------|----------------|-----------|
| 1  | 56.52           | --              | 65.53           | 112.04         | --             | 130.05         | <b>E</b> | <b>659.34</b>   | <b>659.84</b>   | 668.35          | 1317.68        | 1318.66        | 1335.69        | <b>M</b>  |
| 2  | 113.07          | --              | 122.07          | 225.12         | --             | 243.13         | <b>I</b> | <b>594.82</b>   | <b>595.31</b>   | <b>603.83</b>   | 1188.64        | 1189.62        | 1206.65        | <b>10</b> |
| 3  | 148.58          | --              | 157.59          | <b>296.16</b>  | --             | <b>314.17</b>  | <b>A</b> | <b>538.28</b>   | <b>538.77</b>   | <b>547.29</b>   | 1075.55        | <b>1076.54</b> | <b>1093.56</b> | <b>9</b>  |
| 4  | 212.61          | 213.11          | 221.62          | <b>424.22</b>  | 425.20         | <b>442.23</b>  | <b>Q</b> | <b>502.76</b>   | <b>503.25</b>   | <b>511.77</b>   | 1004.52        | 1005.50        | 1022.53        | <b>8</b>  |
| 5  | 270.13          | <b>270.62</b>   | 279.13          | <b>539.25</b>  | <b>540.23</b>  | <b>557.26</b>  | <b>D</b> | 438.73          | 439.22          | <b>447.74</b>   | 876.46         | 877.44         | <b>894.47</b>  | <b>7</b>  |
| 6  | 343.66          | 344.15          | 352.67          | 686.31         | 687.30         | <b>704.32</b>  | <b>F</b> | 381.22          | 381.71          | 390.22          | <b>761.43</b>  | 762.41         | <b>779.44</b>  | <b>6</b>  |
| 7  | 407.71          | 408.20          | 416.71          | 814.41         | 815.39         | <b>832.42</b>  | <b>K</b> | 307.68          | 308.18          | 316.69          | 614.36         | <b>615.35</b>  | <b>632.37</b>  | <b>5</b>  |
| 8  | 458.23          | 458.72          | 467.24          | <b>915.46</b>  | <b>916.44</b>  | 933.47         | <b>T</b> | 243.64          | 244.13          | <b>252.64</b>   | 486.27         | <b>487.25</b>  | <b>504.28</b>  | <b>4</b>  |
| 9  | 515.75          | 516.24          | 524.75          | <b>1030.48</b> | <b>1031.47</b> | <b>1048.49</b> | <b>D</b> | 193.11          | 193.61          | 202.12          | 385.22         | 386.20         | <b>403.23</b>  | <b>3</b>  |
| 10 | 572.29          | 572.78          | 581.29          | 1143.57        | <b>1144.55</b> | <b>1161.58</b> | <b>L</b> | 135.60          | 136.09          | 144.61          | 270.19         | <b>271.18</b>  | <b>288.20</b>  | <b>2</b>  |
|    | --              | --              | --              | --             | --             | --             | <b>R</b> | 79.06           | 79.55           | 88.06           | 157.11         | 158.09         | 175.12         | <b>1</b>  |

### Supplemental Figure 1B. H3 EIAQDF<sup>79</sup>K(Me<sub>1</sub>)TDLR Peptide fragment

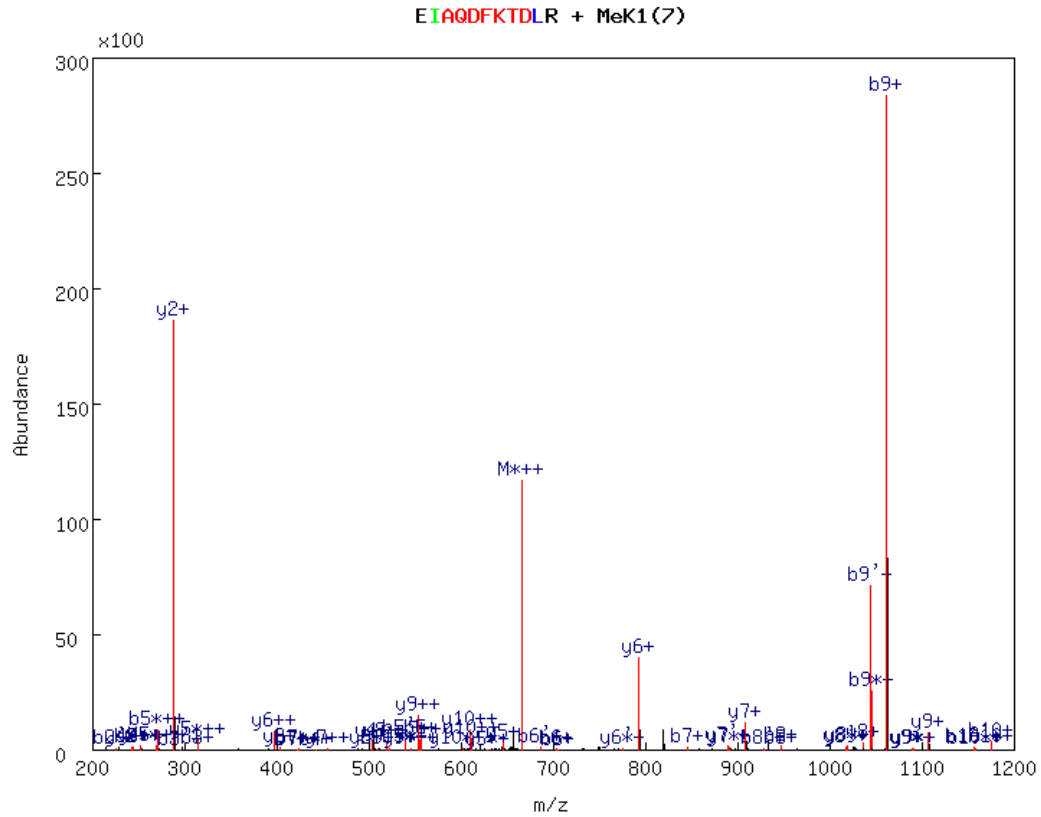

Index scan# charge score pp pp<sub>2</sub> pp<sub>lag</sub> m/z MW(obs) MW delta miss Unique sequence + modifications  
893 1563 +2 56 **21.5** **8.3** **10.9** 675.3580 1349.7088 1349.7060 0.0028 0 \* **EIAQDFKTDLR** + MeK1(7)

| #  | b <sup>++</sup> | b <sup>++</sup> | b <sup>++</sup> | b <sup>+</sup> | b <sup>+</sup> | b <sup>+</sup> | seq | y <sup>++</sup> | y <sup>++</sup> | y <sup>++</sup> | y <sup>+</sup> | y <sup>+</sup> | y <sup>+</sup> | #  |
|----|-----------------|-----------------|-----------------|----------------|----------------|----------------|-----|-----------------|-----------------|-----------------|----------------|----------------|----------------|----|
| 1  | 56.52           | --              | 65.53           | 112.04         | --             | 130.05         | E   | <b>666.35</b>   | <b>666.84</b>   | 675.36          | 1331.70        | 1332.68        | 1349.71        | M  |
| 2  | 113.07          | --              | 122.07          | <b>225.12</b>  | --             | <b>243.13</b>  | I   | <b>601.83</b>   | <b>602.32</b>   | <b>610.84</b>   | 1202.65        | 1203.64        | 1220.66        | 10 |
| 3  | 148.58          | --              | 157.59          | <b>296.16</b>  | --             | <b>314.17</b>  | A   | <b>545.29</b>   | <b>545.78</b>   | <b>554.29</b>   | <b>1089.57</b> | <b>1090.55</b> | <b>1107.58</b> | 9  |
| 4  | 212.61          | 213.11          | 221.62          | <b>424.22</b>  | 425.20         | <b>442.23</b>  | Q   | <b>509.77</b>   | <b>510.26</b>   | <b>518.77</b>   | <b>1018.53</b> | <b>1019.52</b> | <b>1036.54</b> | 8  |
| 5  | <b>270.13</b>   | <b>270.62</b>   | 279.13          | <b>539.25</b>  | <b>540.23</b>  | <b>557.26</b>  | D   | 445.74          | 446.23          | <b>454.75</b>   | <b>890.47</b>  | <b>891.46</b>  | <b>908.48</b>  | 7  |
| 6  | 343.66          | 344.15          | 352.67          | <b>686.31</b>  | 687.30         | <b>704.32</b>  | F   | 388.23          | 388.72          | <b>397.23</b>   | <b>775.45</b>  | <b>776.43</b>  | <b>793.46</b>  | 6  |
| 7  | 414.72          | 415.21          | <b>423.72</b>   | 828.43         | 829.41         | <b>846.44</b>  | K   | <b>314.69</b>   | <b>315.18</b>   | 323.70          | 628.38         | <b>629.36</b>  | <b>646.39</b>  | 5  |
| 8  | 465.24          | 465.73          | 474.25          | <b>929.47</b>  | 930.46         | <b>947.48</b>  | T   | <b>243.64</b>   | <b>244.13</b>   | <b>252.64</b>   | 486.27         | 487.25         | <b>504.28</b>  | 4  |
| 9  | <b>522.75</b>   | 523.25          | 531.76          | <b>1044.50</b> | <b>1045.48</b> | <b>1062.51</b> | D   | 193.11          | 193.61          | 202.12          | 385.22         | 386.20         | <b>403.23</b>  | 3  |
| 10 | 579.30          | 579.79          | 588.30          | <b>1157.58</b> | <b>1158.57</b> | <b>1175.59</b> | L   | 135.60          | 136.09          | 144.61          | <b>270.19</b>  | <b>271.18</b>  | <b>288.20</b>  | 2  |
|    | --              | --              | --              | --             | --             | --             | R   | 79.06           | 79.55           | 88.06           | 157.11         | 158.09         | 175.12         | 1  |

### Supplemental Figure 1C. H3 EIAQDF<sup>79</sup>K(Me<sub>2</sub>)TDLR Peptide fragment

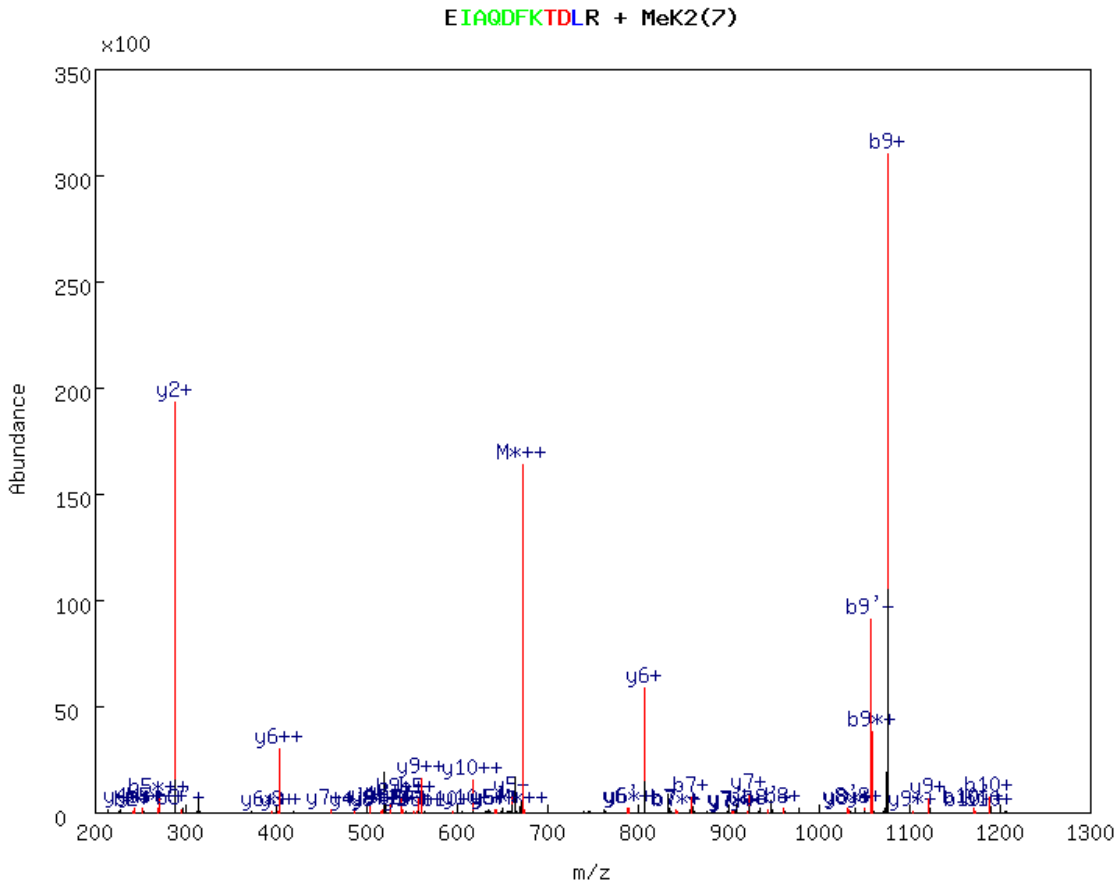

Index scan# charge score pp pp<sub>2</sub> pp<sub>tag</sub> m/z MW(obs) MW delta miss Unique sequence + modifications  
[917](#) 1570 +2 55 **18.4** **8.7** **6.9** 682.3644 1363.7216 1363.7216 -0.0000 0 × **EIAQDFK TDLR + MeK2(7)**

| #  | b <sup>++</sup> | b <sup>++</sup> | b <sup>++</sup> | b <sup>+</sup> | b <sup>+</sup> | b <sup>+</sup> | seq | y <sup>++</sup> | y <sup>++</sup> | y <sup>++</sup> | y <sup>+</sup> | y <sup>+</sup> | y <sup>+</sup> | #  |
|----|-----------------|-----------------|-----------------|----------------|----------------|----------------|-----|-----------------|-----------------|-----------------|----------------|----------------|----------------|----|
| 1  | 56.52           | --              | 65.53           | 112.04         | --             | 130.05         | E   | <b>673.36</b>   | <b>673.85</b>   | 682.36          | 1345.71        | 1346.70        | 1363.72        | M  |
| 2  | 113.07          | --              | 122.07          | 225.12         | --             | <b>243.13</b>  | I   | 608.84          | 609.33          | <b>617.84</b>   | 1216.67        | 1217.65        | 1234.68        | 10 |
| 3  | 148.58          | --              | 157.59          | <b>296.16</b>  | --             | 314.17         | A   | <b>552.30</b>   | <b>552.79</b>   | <b>561.30</b>   | <b>1103.58</b> | <b>1104.57</b> | <b>1121.59</b> | 9  |
| 4  | 212.61          | 213.11          | 221.62          | 424.22         | 425.20         | 442.23         | Q   | <b>516.78</b>   | <b>517.27</b>   | <b>525.78</b>   | <b>1032.55</b> | <b>1033.53</b> | <b>1050.56</b> | 8  |
| 5  | <b>270.13</b>   | <b>270.62</b>   | 279.13          | <b>539.25</b>  | <b>540.23</b>  | <b>557.26</b>  | D   | 452.75          | 453.24          | <b>461.75</b>   | <b>904.49</b>  | <b>905.47</b>  | <b>922.50</b>  | 7  |
| 6  | 343.66          | 344.15          | 352.67          | 686.31         | 687.30         | 704.32         | F   | <b>395.23</b>   | <b>395.73</b>   | <b>404.24</b>   | <b>789.46</b>  | <b>790.45</b>  | <b>807.47</b>  | 6  |
| 7  | 421.72          | 422.22          | 430.73          | <b>842.44</b>  | <b>843.42</b>  | <b>860.45</b>  | K   | 321.70          | 322.19          | 330.71          | <b>642.39</b>  | <b>643.38</b>  | <b>660.40</b>  | 5  |
| 8  | 472.25          | 472.74          | 481.25          | <b>943.49</b>  | 944.47         | <b>961.50</b>  | T   | <b>243.64</b>   | <b>244.13</b>   | <b>252.64</b>   | <b>486.27</b>  | 487.25         | <b>504.28</b>  | 4  |
| 9  | 529.76          | 530.25          | <b>538.77</b>   | <b>1058.52</b> | <b>1059.50</b> | <b>1076.53</b> | D   | 193.11          | 193.61          | 202.12          | 385.22         | 386.20         | <b>403.23</b>  | 3  |
| 10 | 586.30          | 586.80          | <b>595.31</b>   | <b>1171.60</b> | <b>1172.58</b> | <b>1189.61</b> | L   | 135.60          | 136.09          | 144.61          | <b>270.19</b>  | <b>271.18</b>  | <b>288.20</b>  | 2  |
|    | --              | --              | --              | --             | --             | --             | R   | 79.06           | 79.55           | 88.06           | 157.11         | 158.09         | 175.12         | 1  |

### Supplemental Figure 1D. H3 EIAQDF<sup>79</sup>K(Me<sub>3</sub>)TDLR Peptide fragment

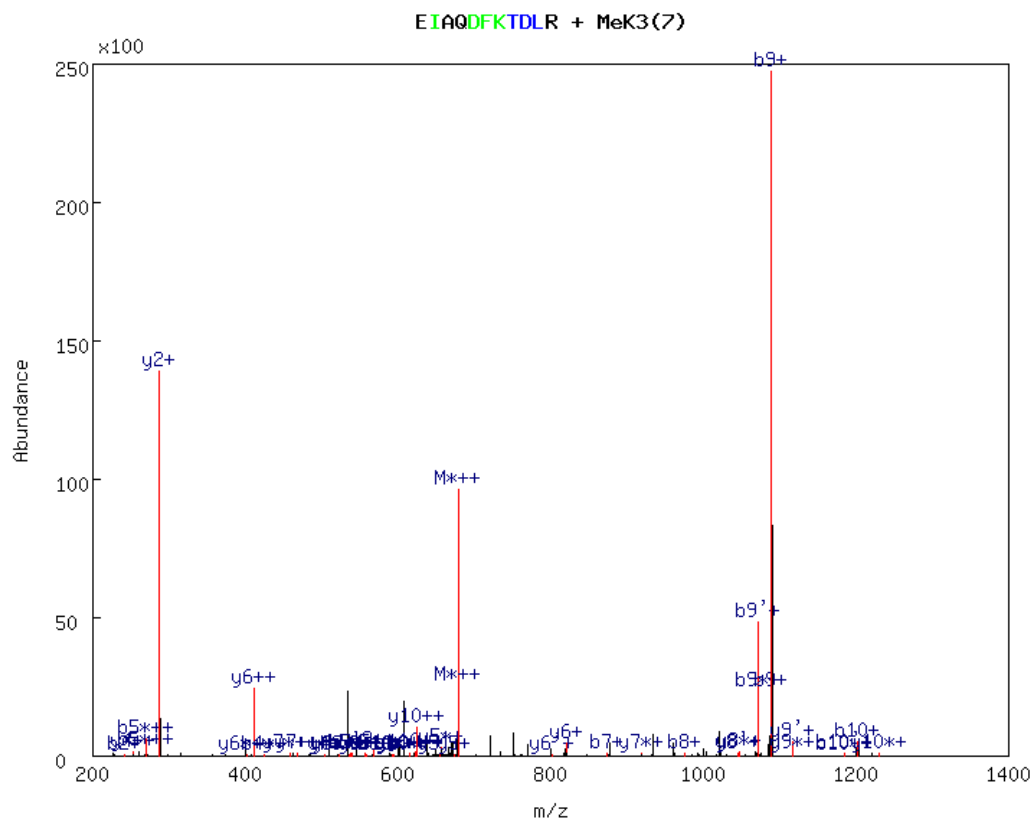

Index scan# charge score pp pp<sub>2</sub> pp<sub>lag</sub> m/z MW(obs) MW delta miss Unique sequence + modifications  
[941](#) 1569 +2 37 **12.3** **7.3** 1.6 689.3741 1377.7410 1377.7373 0.0038 0 × **EIAQDFK TDLR + MeK3(7)**

| #  | b <sup>2+</sup> | b <sup>3+</sup> | b <sup>4+</sup> | b <sup>5+</sup> | b <sup>6+</sup> | seq            | y <sup>2+</sup> | y <sup>3+</sup> | y <sup>4+</sup> | y <sup>5+</sup> | y <sup>6+</sup> | #              |               |           |
|----|-----------------|-----------------|-----------------|-----------------|-----------------|----------------|-----------------|-----------------|-----------------|-----------------|-----------------|----------------|---------------|-----------|
| 1  | 56.52           | --              | 65.53           | 112.04          | --              | 130.05         | <b>E</b>        | <b>680.37</b>   | <b>680.86</b>   | 689.37          | 1359.73         | 1360.71        | 1377.74       | <b>M</b>  |
| 2  | 113.07          | --              | 122.07          | 225.12          | --              | <b>243.13</b>  | <b>I</b>        | <b>615.85</b>   | <b>616.34</b>   | <b>624.85</b>   | <b>1230.68</b>  | <b>1231.67</b> | 1248.69       | <b>10</b> |
| 3  | 148.58          | --              | 157.59          | 296.16          | --              | 314.17         | <b>A</b>        | <b>559.30</b>   | <b>559.80</b>   | <b>568.31</b>   | <b>1117.60</b>  | <b>1118.58</b> | 1135.61       | <b>9</b>  |
| 4  | 212.61          | 213.11          | 221.62          | 424.22          | <b>425.20</b>   | 442.23         | <b>Q</b>        | <b>523.79</b>   | <b>524.28</b>   | 532.79          | <b>1046.56</b>  | <b>1047.55</b> | 1064.57       | <b>8</b>  |
| 5  | <b>270.13</b>   | <b>270.62</b>   | 279.13          | <b>539.25</b>   | <b>540.23</b>   | <b>557.26</b>  | <b>D</b>        | <b>459.76</b>   | <b>460.25</b>   | <b>468.76</b>   | 918.50          | <b>919.49</b>  | 936.51        | <b>7</b>  |
| 6  | 343.66          | 344.15          | 352.67          | 686.31          | 687.30          | 704.32         | <b>F</b>        | <b>402.24</b>   | <b>402.73</b>   | <b>411.25</b>   | <b>803.48</b>   | 804.46         | <b>821.49</b> | <b>6</b>  |
| 7  | 428.73          | 429.22          | 437.74          | 856.46          | 857.44          | <b>874.47</b>  | <b>K</b>        | 328.71          | 329.20          | 337.71          | <b>656.41</b>   | <b>657.39</b>  | <b>674.42</b> | <b>5</b>  |
| 8  | 479.26          | 479.75          | 488.26          | 957.50          | 958.49          | <b>975.51</b>  | <b>T</b>        | <b>243.64</b>   | 244.13          | <b>252.64</b>   | 486.27          | 487.25         | <b>504.28</b> | <b>4</b>  |
| 9  | <b>536.77</b>   | <b>537.26</b>   | 545.77          | <b>1072.53</b>  | <b>1073.51</b>  | <b>1090.54</b> | <b>D</b>        | 193.11          | 193.61          | 202.12          | 385.22          | 386.20         | 403.23        | <b>3</b>  |
| 10 | <b>593.31</b>   | <b>593.80</b>   | 602.32          | <b>1185.62</b>  | <b>1186.60</b>  | <b>1203.63</b> | <b>L</b>        | 135.60          | 136.09          | 144.61          | <b>270.19</b>   | <b>271.18</b>  | <b>288.20</b> | <b>2</b>  |
|    | --              | --              | --              | --              | --              | --             | <b>R</b>        | 79.06           | 79.55           | 88.06           | 157.11          | 158.09         | 175.12        | <b>1</b>  |

### Supplemental Figure 1E. H3 FQ<sup>56</sup>K(Ace<sub>0</sub>)STELLIR Peptide fragment

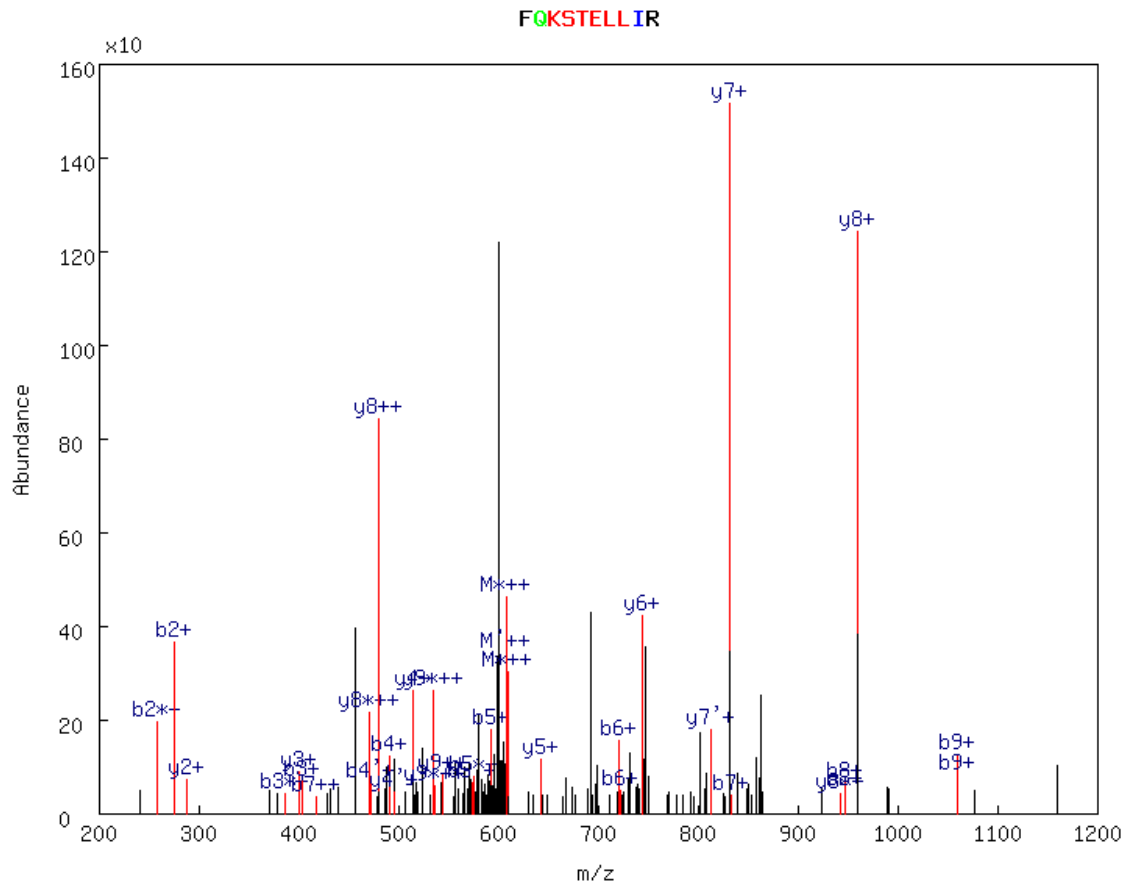

Index scan# charge score pp pp<sub>2</sub> pp<sub>tag</sub> m/z MW(obs) MW delta miss Unique sequence + modifications  
666 1512 +2 30 **7.3** **9.7** **6.8** 617.8636 1234.7200 1234.7154 0.0046 0 \* **FQKSTELLIR**

| # | b <sup>++</sup> | b <sup>+</sup> | b <sup>+</sup> | b <sup>+</sup> | b <sup>+</sup> | seq | y <sup>++</sup> | y <sup>++</sup> | y <sup>++</sup> | y <sup>+</sup> | y <sup>+</sup> | y <sup>+</sup> | # |
|---|-----------------|----------------|----------------|----------------|----------------|-----|-----------------|-----------------|-----------------|----------------|----------------|----------------|---|
| 1 |                 |                | 74.54          |                |                | F   | <b>608.86</b>   | <b>609.35</b>   | 617.86          | 1216.70        | 1217.69        | 1234.72        | M |
| 2 |                 | 130.06         | 138.57         |                | <b>259.11</b>  | Q   | <b>535.32</b>   | <b>535.81</b>   | <b>544.33</b>   | 1069.64        | 1070.62        | 1087.65        | 9 |
| 3 |                 | 194.10         | 202.62         |                | <b>387.20</b>  | K   | <b>471.29</b>   | <b>471.78</b>   | <b>480.30</b>   | 941.58         | <b>942.56</b>  | <b>959.59</b>  | 8 |
| 4 | 237.13          | 237.62         | 246.13         | <b>473.25</b>  | 474.23         | S   | 407.25          | 407.74          | 416.25          | <b>813.48</b>  | 814.47         | <b>831.49</b>  | 7 |
| 5 | <b>287.65</b>   | <b>288.14</b>  | 296.66         | <b>574.30</b>  | <b>575.28</b>  | T   | 363.73          | 364.22          | 372.73          | 726.45         | 727.43         | <b>744.46</b>  | 6 |
| 6 | 352.17          | 352.67         | 361.18         | 703.34         | 704.32         | E   | 313.21          | 313.70          | 322.21          | 625.40         | 626.39         | <b>643.41</b>  | 5 |
| 7 | 408.72          | 409.21         | <b>417.72</b>  | 816.43         | 817.41         | L   | 248.68          | 249.18          | 257.69          | <b>496.36</b>  | 497.34         | <b>514.37</b>  | 4 |
| 8 | 465.26          | 465.75         | 474.26         | 929.51         | 930.49         | L   | 192.14          | 192.63          | 201.15          | 383.28         | 384.26         | <b>401.29</b>  | 3 |
| 9 | 521.80          | 522.29         | 530.81         | 1042.59        | 1043.58        | I   | 135.60          | 136.09          | 144.61          | 270.19         | 271.18         | <b>288.20</b>  | 2 |
|   |                 |                |                |                |                | R   | 79.06           | 79.55           | 88.06           | 157.11         | 158.09         | 175.12         | 1 |

### Supplemental Figure 1F. H3 FQ<sup>56</sup>K(Ace<sub>1</sub>)STELLIR Peptide fragment

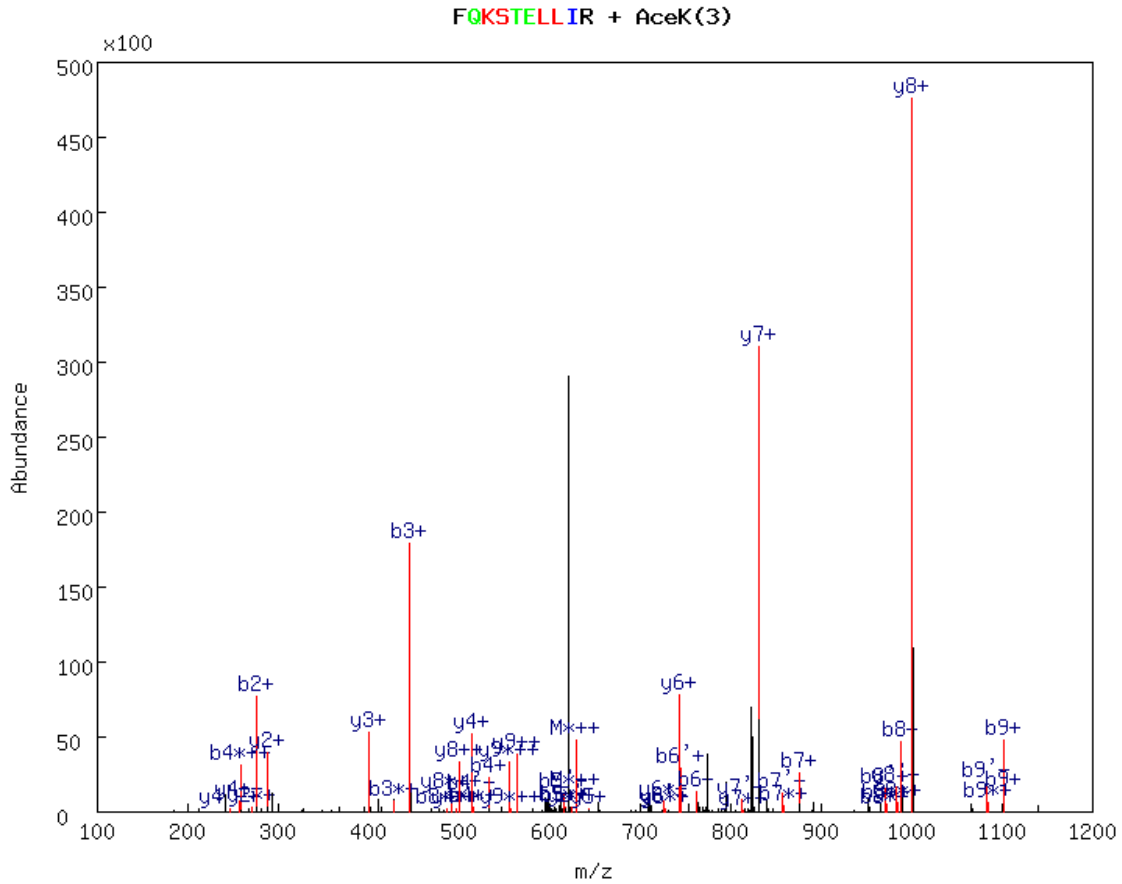

Index scan# charge score pp pp<sub>2</sub> pp<sub>tag</sub> m/z MW(obs) MW delta miss Unique sequence + modifications  
[759](#) 2091 +2 46 **16.7** **9.9** **5.1** 638.8677 1276.7282 1276.7260 0.0022 0 \* **FQKSTELLIR** + AceK(3)

| # | b <sup>++</sup> | b <sup>++</sup> | b <sup>++</sup> | b <sup>+</sup> | b <sup>+</sup> | b <sup>+</sup> | seq | y <sup>++</sup> | y <sup>++</sup> | y <sup>++</sup> | y <sup>+</sup> | y <sup>+</sup> | y <sup>+</sup> | # |
|---|-----------------|-----------------|-----------------|----------------|----------------|----------------|-----|-----------------|-----------------|-----------------|----------------|----------------|----------------|---|
| 1 | --              | --              | 74.54           | --             | --             | 148.08         | F   | <b>629.86</b>   | <b>630.35</b>   | 638.87          | 1258.72        | 1259.70        | 1276.73        | M |
| 2 | --              | 130.06          | 138.57          | --             | <b>259.11</b>  | <b>276.13</b>  | Q   | <b>556.33</b>   | <b>556.82</b>   | <b>565.33</b>   | 1111.65        | 1112.63        | 1129.66        | 9 |
| 3 | --              | 215.11          | 223.62          | --             | <b>429.21</b>  | <b>446.24</b>  | K   | <b>492.30</b>   | <b>492.79</b>   | <b>501.30</b>   | <b>983.59</b>  | <b>984.57</b>  | <b>1001.60</b> | 8 |
| 4 | <b>258.13</b>   | <b>258.63</b>   | 267.14          | <b>515.26</b>  | <b>516.25</b>  | <b>533.27</b>  | S   | 407.25          | 407.74          | 416.25          | <b>813.48</b>  | <b>814.47</b>  | <b>831.49</b>  | 7 |
| 5 | 308.66          | 309.15          | 317.66          | <b>616.31</b>  | <b>617.29</b>  | 634.32         | T   | 363.73          | 364.22          | 372.73          | <b>726.45</b>  | <b>727.43</b>  | <b>744.46</b>  | 6 |
| 6 | 373.18          | 373.67          | 382.18          | <b>745.35</b>  | 746.34         | <b>763.36</b>  | E   | 313.21          | 313.70          | 322.21          | <b>625.40</b>  | 626.39         | <b>643.41</b>  | 5 |
| 7 | <b>429.72</b>   | 430.21          | 438.73          | <b>858.44</b>  | <b>859.42</b>  | <b>876.45</b>  | L   | <b>248.68</b>   | 249.18          | <b>257.69</b>   | 496.36         | <b>497.34</b>  | <b>514.37</b>  | 4 |
| 8 | <b>486.26</b>   | <b>486.76</b>   | 495.27          | <b>971.52</b>  | <b>972.50</b>  | <b>989.53</b>  | L   | 192.14          | 192.63          | 201.15          | 383.28         | 384.26         | <b>401.29</b>  | 3 |
| 9 | 542.81          | 543.30          | 551.81          | <b>1084.60</b> | <b>1085.59</b> | <b>1102.61</b> | I   | 135.60          | 136.09          | 144.61          | 270.19         | <b>271.18</b>  | <b>288.20</b>  | 2 |
|   | --              | --              | --              | --             | --             | --             | R   | 79.06           | 79.55           | 88.06           | 157.11         | 158.09         | 175.12         | 1 |

**Supplemental Figures 1A-F.** A-D) MS/MS spectra of the H3 K79 peptide EIAQDF<sup>79</sup>K(Me<sub>0.3</sub>)TDLR<sup>2+</sup> and E&F) MS/MS spectra of the H3 K56 peptide of FQ<sup>56</sup>K(Ace<sub>0.1</sub>)STELLIR from SILAC light wild type:heavy mutant H4 K16Q

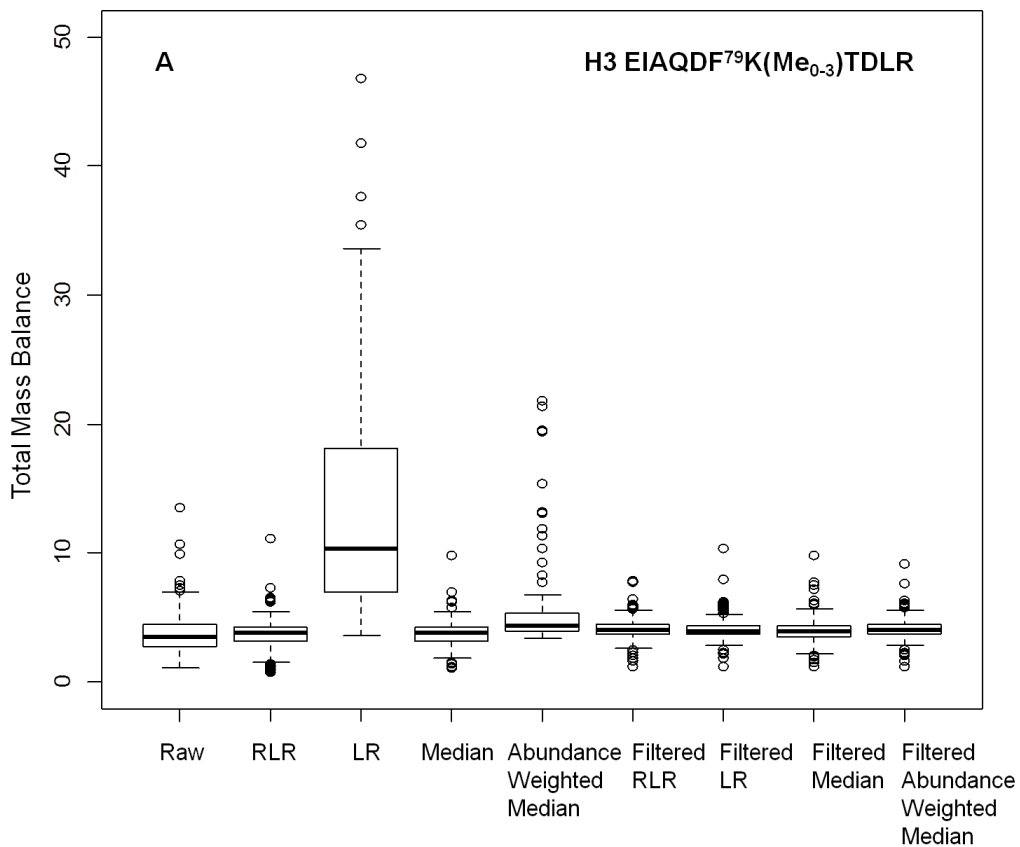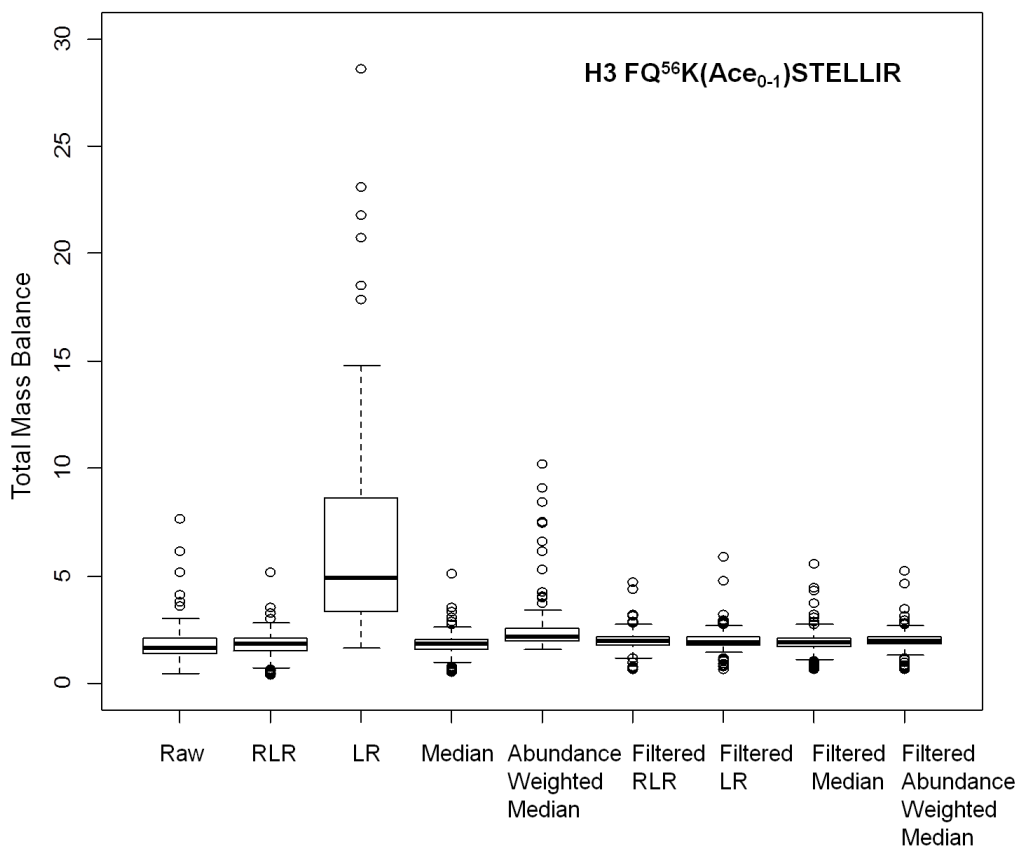



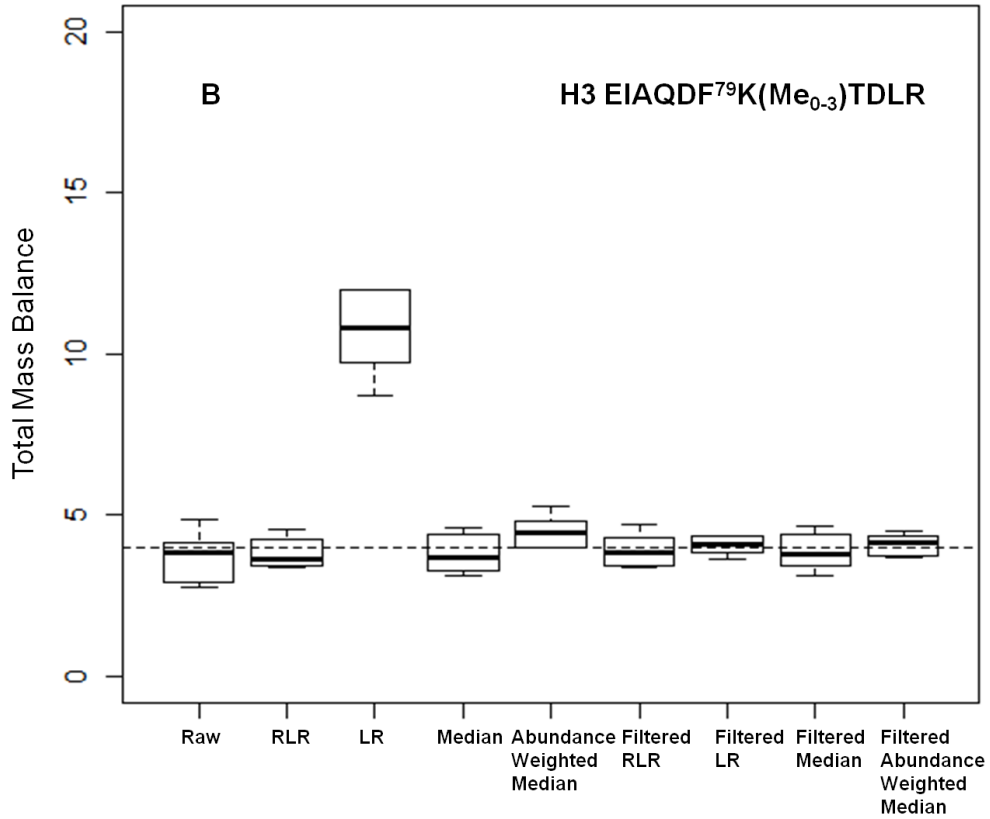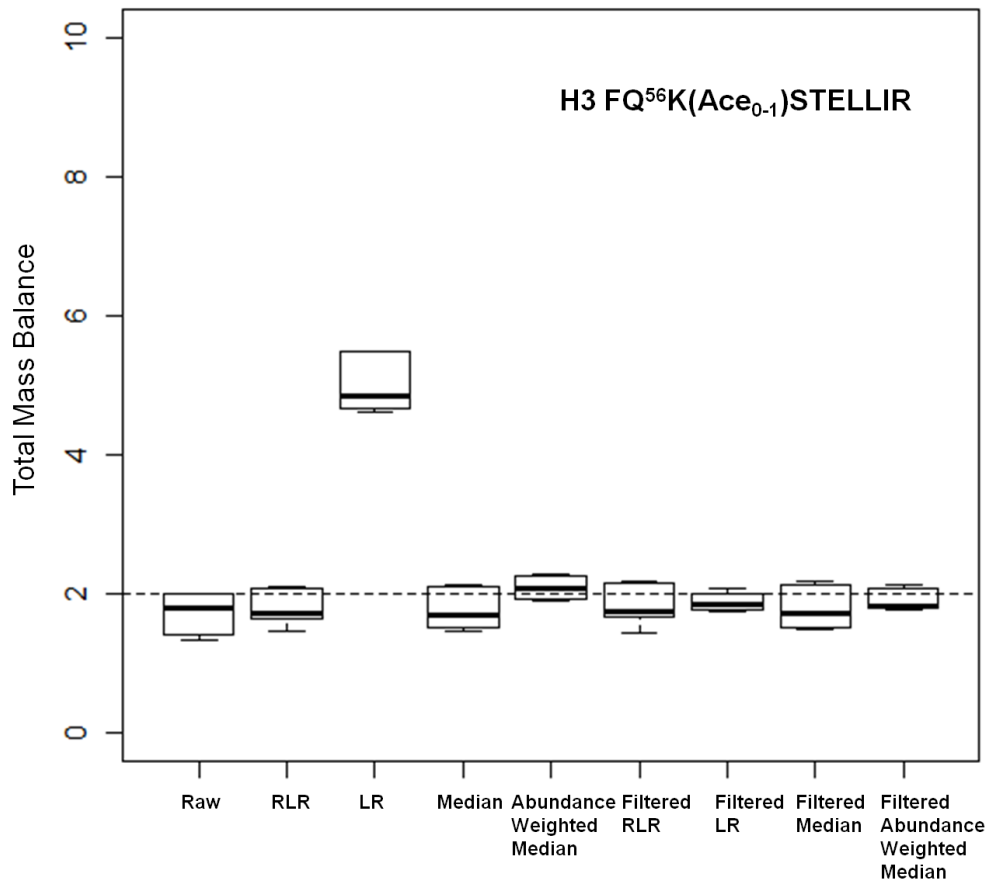

**Supplemental Figure 2.** Boxplot summarizing the effect of different normalization strategies on mass balance (sum of all isoform ratios) for: A) H3 EIAQDF<sup>79</sup>K(Me<sub>0-3</sub>)TDLR and H3 FQ<sup>56</sup>K(Ace<sub>0-1</sub>)STELLIR in 44 mutants and B) H3 EIAQDF<sup>79</sup>K(Me<sub>0-3</sub>)TDLR and H3 FQ<sup>56</sup>K(Ace<sub>0-1</sub>)STELLIR in wild type only. On the x axis, from left to right, is the raw, robust linear regression (RLR), linear regression (LR), median and abundance weighted median, filtered ( $0.5 \leq \text{ratio} \leq 2$ ) robust linear regression, filtered linear regression, filtered median and filtered abundance weighted median. The y axis is for the total mass balance for the target peptides.

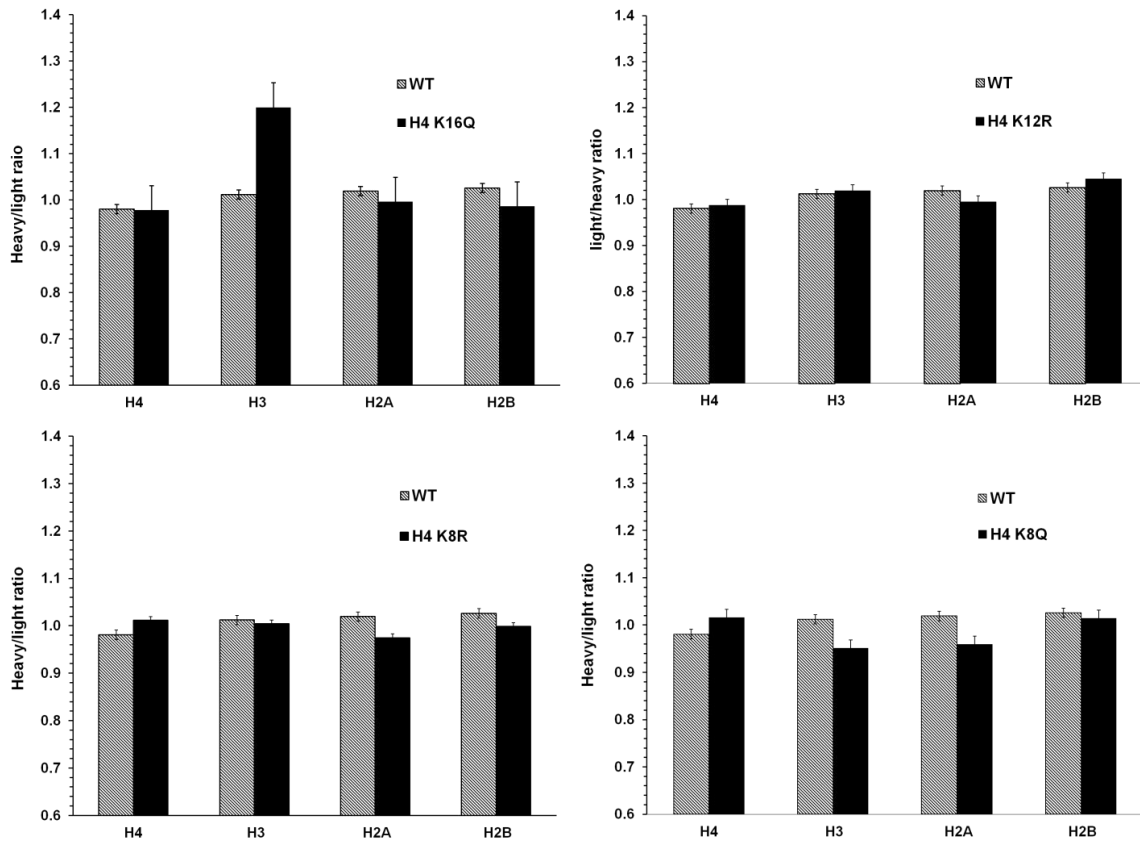

**Supplemental Figure 3.** Representative SILAC derived protein ratios for the core histone in the mixture of light WT and heavy mutants: H4 K16Q, K12R, K8R and K8Q, respectively. Error bars correspond to two standard errors.

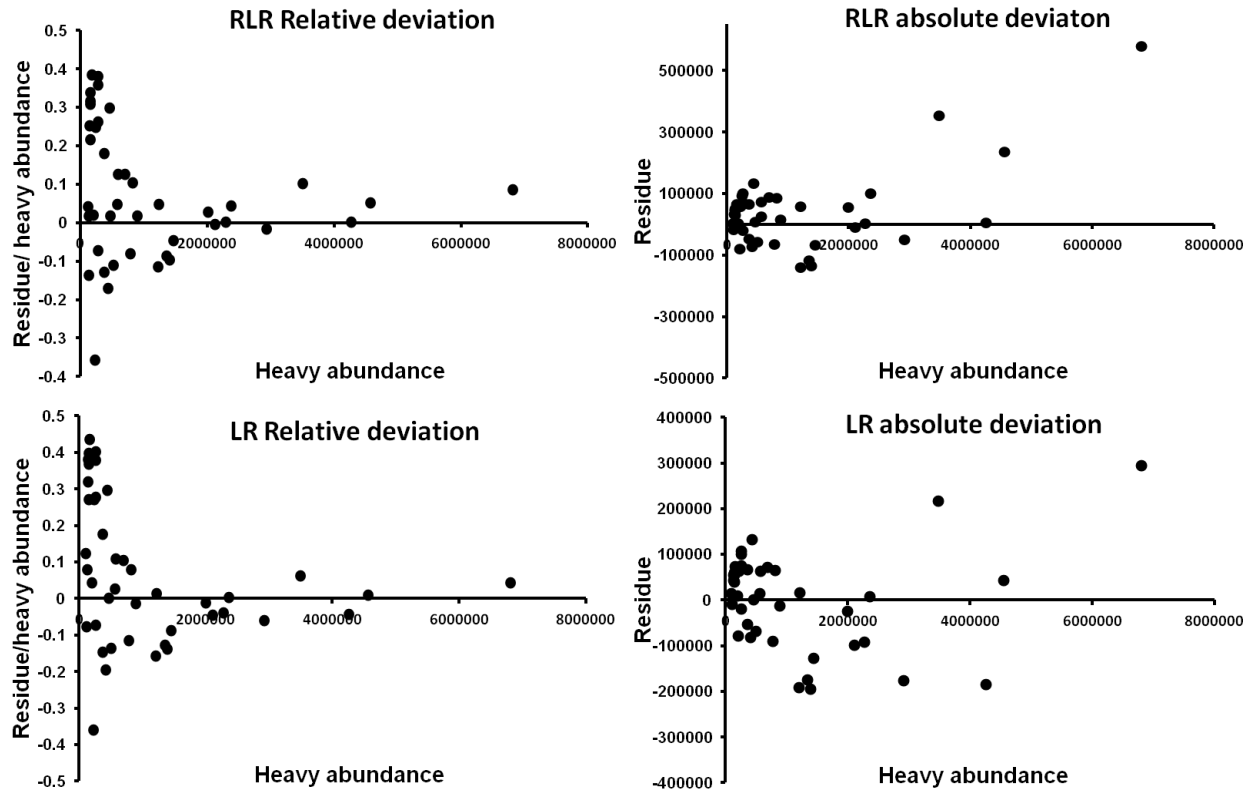

**Supplemental Figure 4.** Relative and absolute residual plots for SILAC peptide ratio determined for the H3 K79Me<sub>0</sub> peptide in a light WT: heavy WT mixture by the robust linear regression (RLR)(top panel) and linear regression (LR)(bottom panel). Both approaches show that the absolute deviation for ratios at high abundance is large, however, they have relatively less relative deviation compared to ratios at low abundance.

H3 EIAQDF<sup>79</sup>K(Me<sub>0-3</sub>)TDLR<sup>2+</sup>

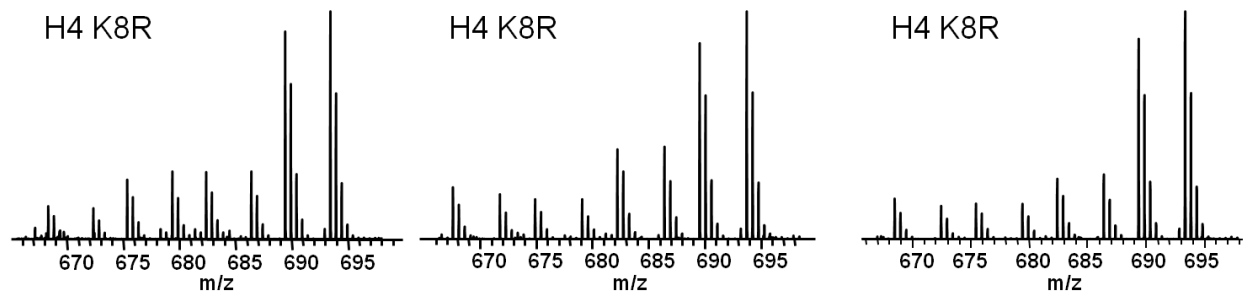

**Supplemental Figure 5.** MS/MS spectra of H3 EIAQDF<sup>79</sup>K(Me<sub>0-3</sub>)TDLR<sup>2+</sup> from the light WT: heavy mutant H4 K8R mixture. Three biological replicates are presented to demonstrate the reproducibility of SILAC labeling.
